# Supplementary material for: Stable highly porous silicon oxycarbide glasses from pre-ceramic hybrids
Source: Royal Society of Chemistry journal article supplement (doi:10.1039/c5ta05656j), 2015-01-01
Supplement: c5ta05656j1.pdf [file c5ta05656j1.pdf]

## ELECTRONIC SUPPLEMENTARY INFORMATION FOR

### **Stable highly porous silicon oxycarbide glasses from pre-ceramic hybrids**

M. Alejandra Mazo\*, Aitana Tamayo, and Juan Rubio

Instituto de Cerámica y Vidrio (CSIC), Kelsen 5, 28049 Madrid (Spain)

\*E-mail: [sandra@icv.csic.es](mailto:sandra@icv.csic.es)

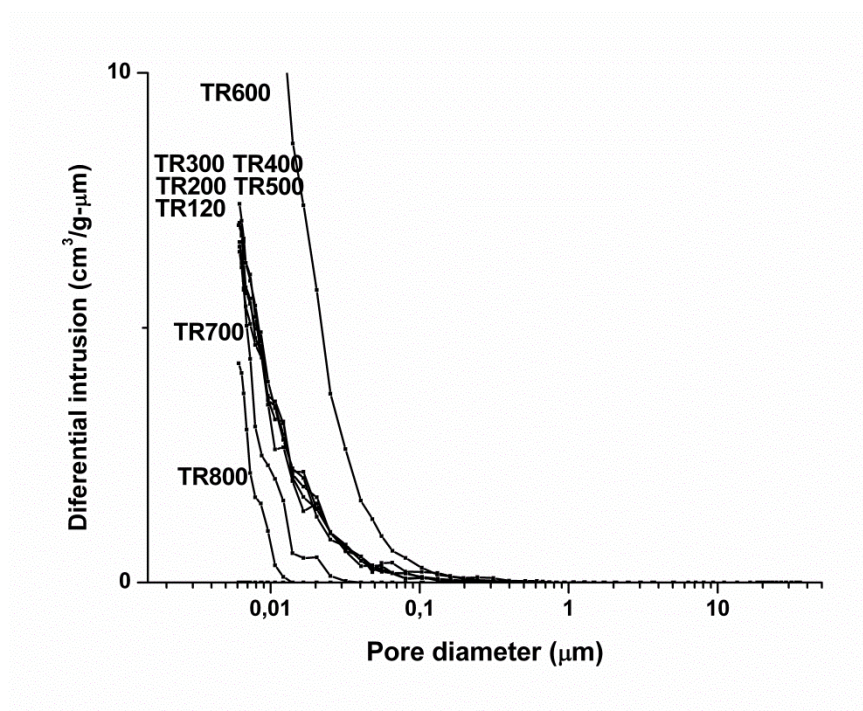

Fig. S 1 PSD obtained by Hg intrusion of TR system at different pyrolysis temperatures. The samples obtained at temperatures higher than 800 °C present a negligible PSD.

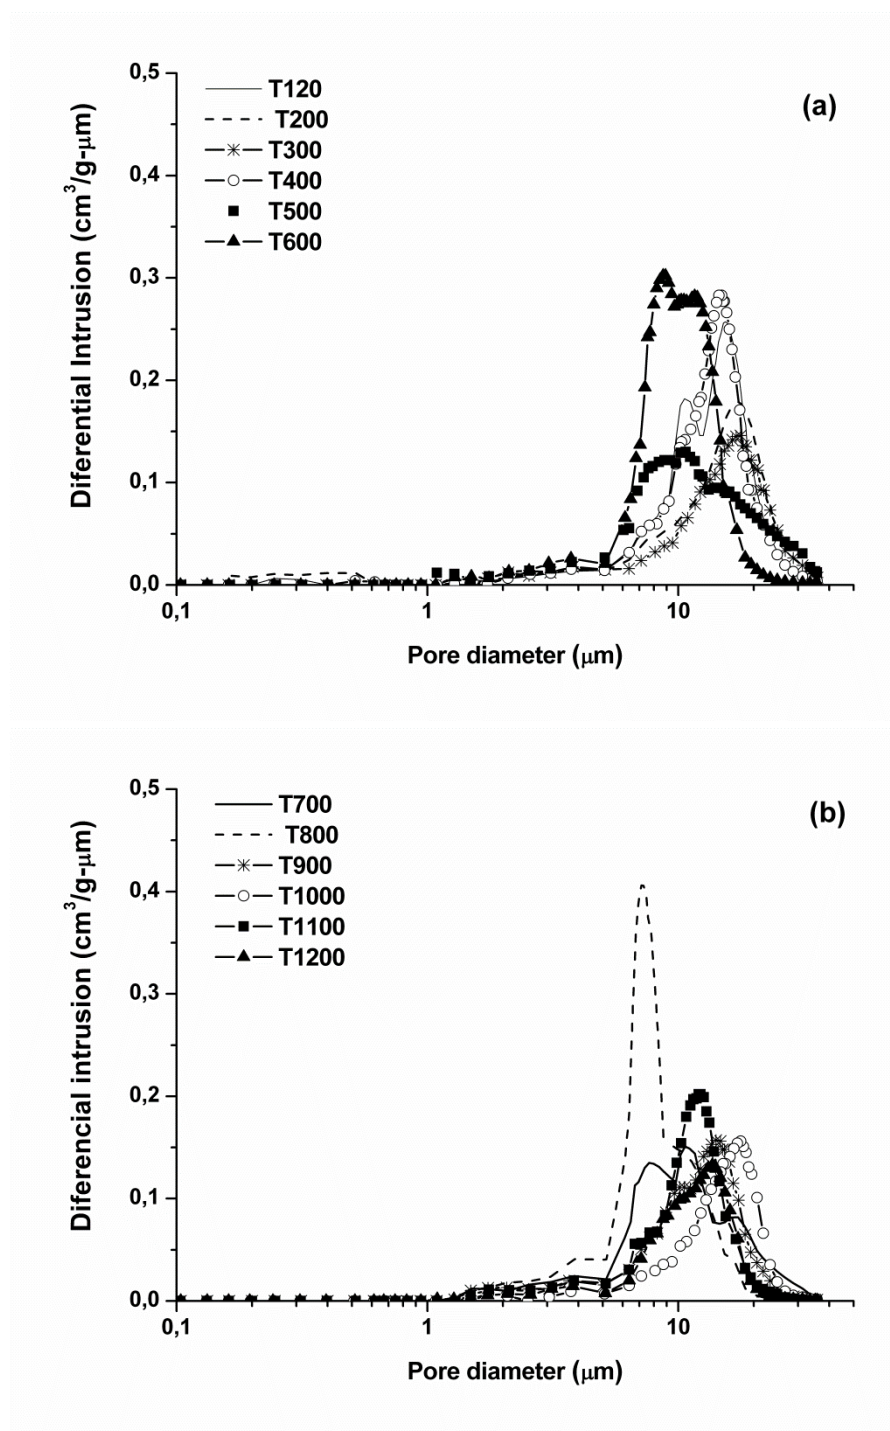

Fig. S 2 PSD obtained by Hg intrusion of T system at different pyrolysis temperatures a) for 120-600 °C and b) for 700-1200 °C.

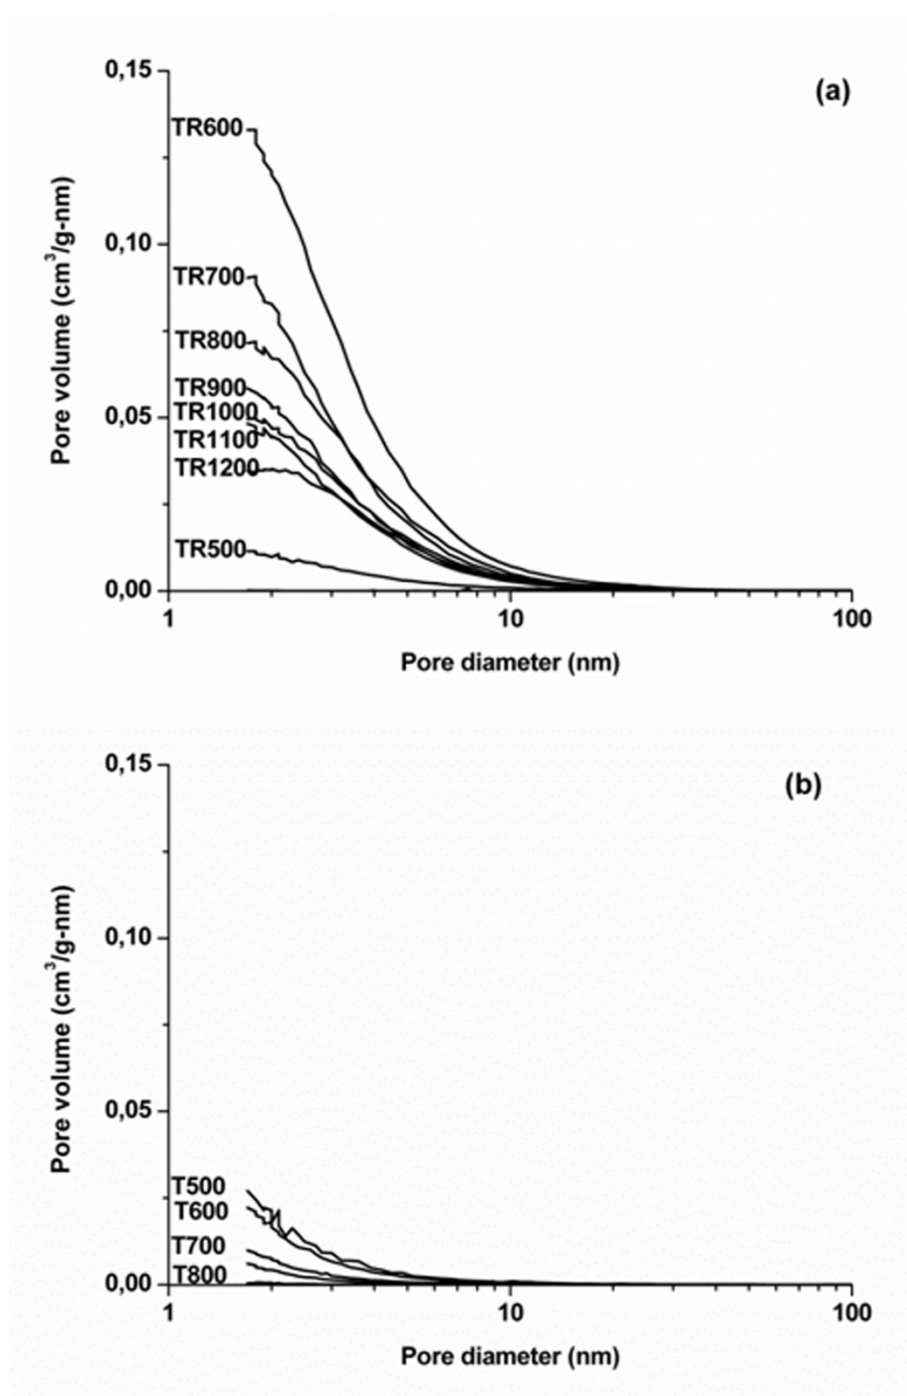

Fig. S 3. PSD obtained by  $N_2$  adsorption-desorption isotherms of a)TR and b) T systems at different pyrolysis temperatures. For T system the samples obtained between 120- 400 °C and 900 – 1200 °C and in the case of TR system those obtained from 120 to 400 °C present a negligible PSD.

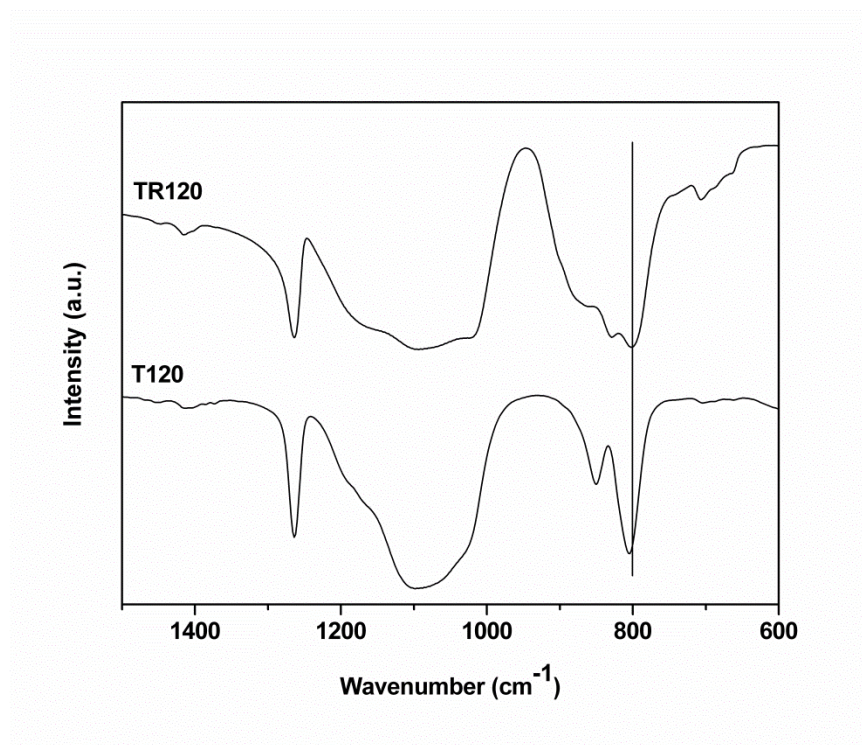

Fig. S4. FT-IR spectra of T and TR hybrid, T120 and TR120, respectively.

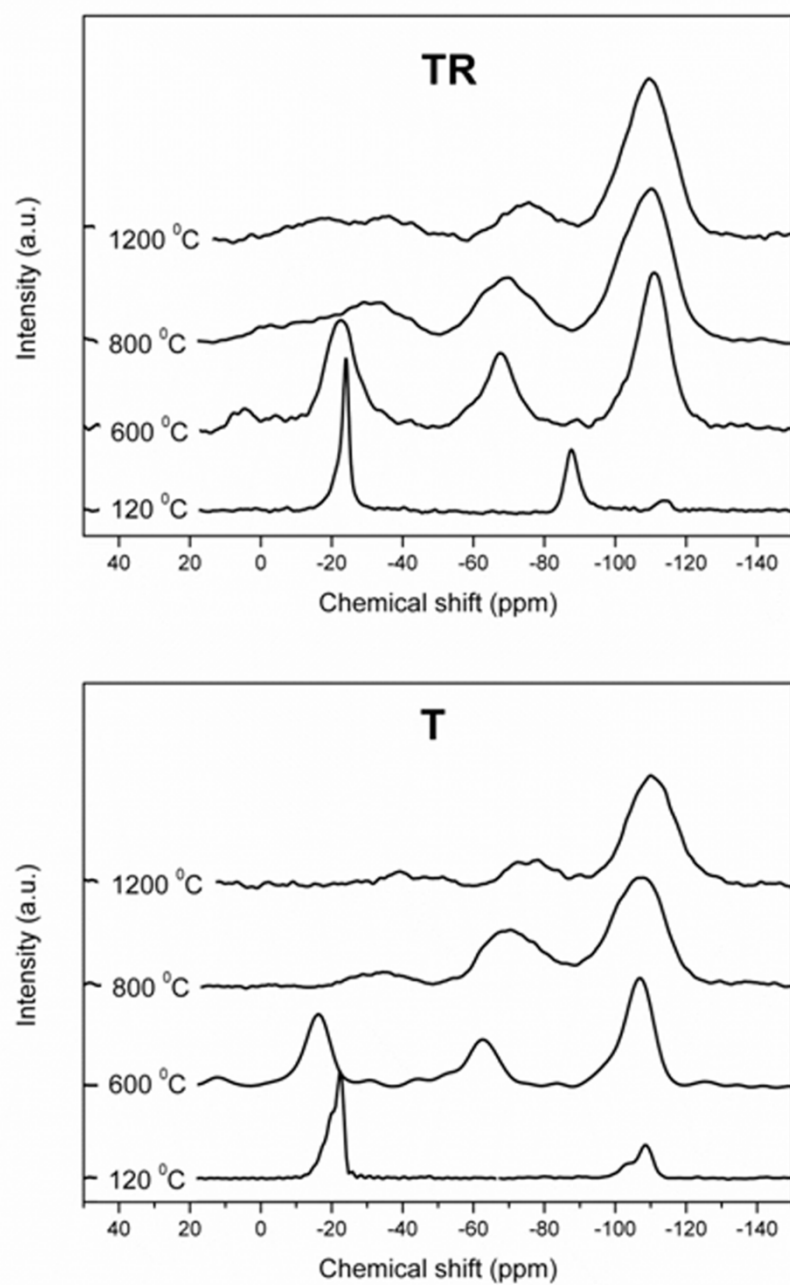

Fig. S5.  $^{29}\text{Si}$  MAS NMR of TR and T systems at selected pyrolysis temperatures.
